# Supplementary material for: Programmable RNA targeting by bacterial Argonaute nucleases with unconventional guide binding and cleavage specificity
Source: PubMed Central journal article supplement (PMC9360449; doi:10.1038/s41467-022-32079-5), 2022-08-08
Supplement: 41467_2022_32079_MOESM1_ESM.pdf [file 41467_2022_32079_MOESM1_ESM.pdf]

# **Programmable RNA targeting by bacterial Argonaute nucleases with unconventional guide binding and cleavage specificity**

Lidiya Lisitskaya, Yeonoh Shin, Aleksei Agapov, Anna Olina,  
Ekaterina Kropocheva, Sergei Ryazansky, Alexei A. Aravin, Daria Esyunina,  
Katsuhiko S. Murakami, Andrey Kulbachinskiy

## **Supplementary Information**

Contains 9 Supplementary Figures and 2 Supplementary Tables

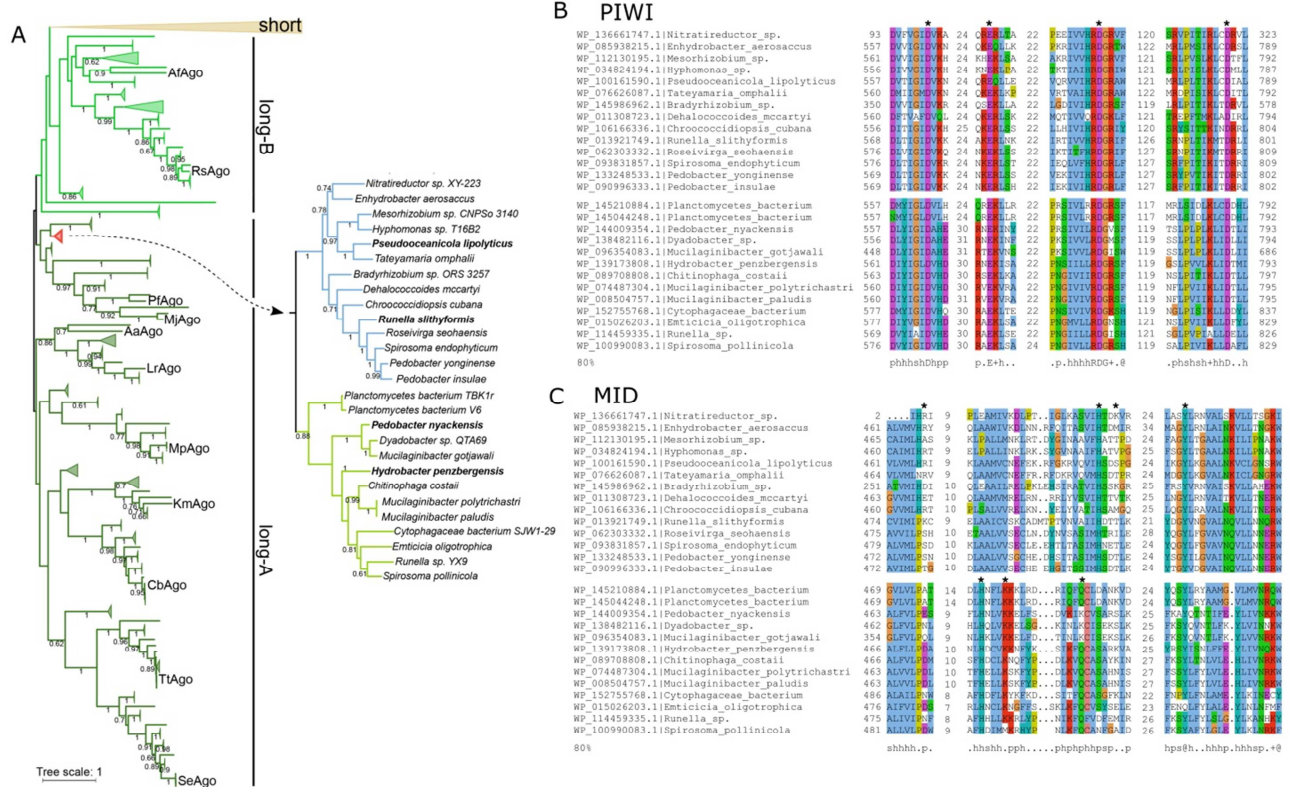

**Supplementary Fig. 1. Phylogenetic analysis of D-R pAgos.** (A) Phylogenetic tree showing positions of previously analysed pAgos and of the new class of D-R pAgos. The ‘Long-A’ clade of pAgos mainly includes catalytically active full-length pAgos, the ‘long-B’ clade includes catalytically inactive full-length pAgos with substitutions in the catalytic tetrad, the ‘short’ clade includes catalytically inactive pAgos containing the PIWI and MID domains but lacking the N-terminal and PAZ domains (Ryazansky et al., 2018). The PliAgo and PnyAgo groups are shown in blue and green, respectively; host bacterial species are indicated. The previously studied pAgos shown on the tree include RsAgo from *Rhodobacter sphaeroides*, AfAgo from *Archaeoglobus fulgidus*, MjAgo from *Methanocaldococcus jannaschii*, PfAgo from *Pyrococcus furiosus*, SeAgo from *Synechococcus elongatus*, TtAgo from *Thermus thermophilus*, KmAgo from *Kurthia massiliensis*, CbAgo from *Clostridium butyricum*, MpAgo from *Marinitoga piezophila*, LrAgo from *Limnothrix rosea* and AaAgo from *Aquifex aeolicus*. (B) Alignment of the active site residues in the PIWI domain in D-R pAgos in the two groups of D-R pAgos (PliAgo group, top; PnyAgo group, bottom). The catalytic tetrad residues are indicated with asterisks, the coloring is based on the consensus shown underneath the alignment. (C) Alignment of the MID pocket sequences in the two groups of D-R pAgos. The residues involved in contacts with the 5'-phosphate in PliAgo (top) and in the canonical MID pocket (bottom) are indicated with asterisks.

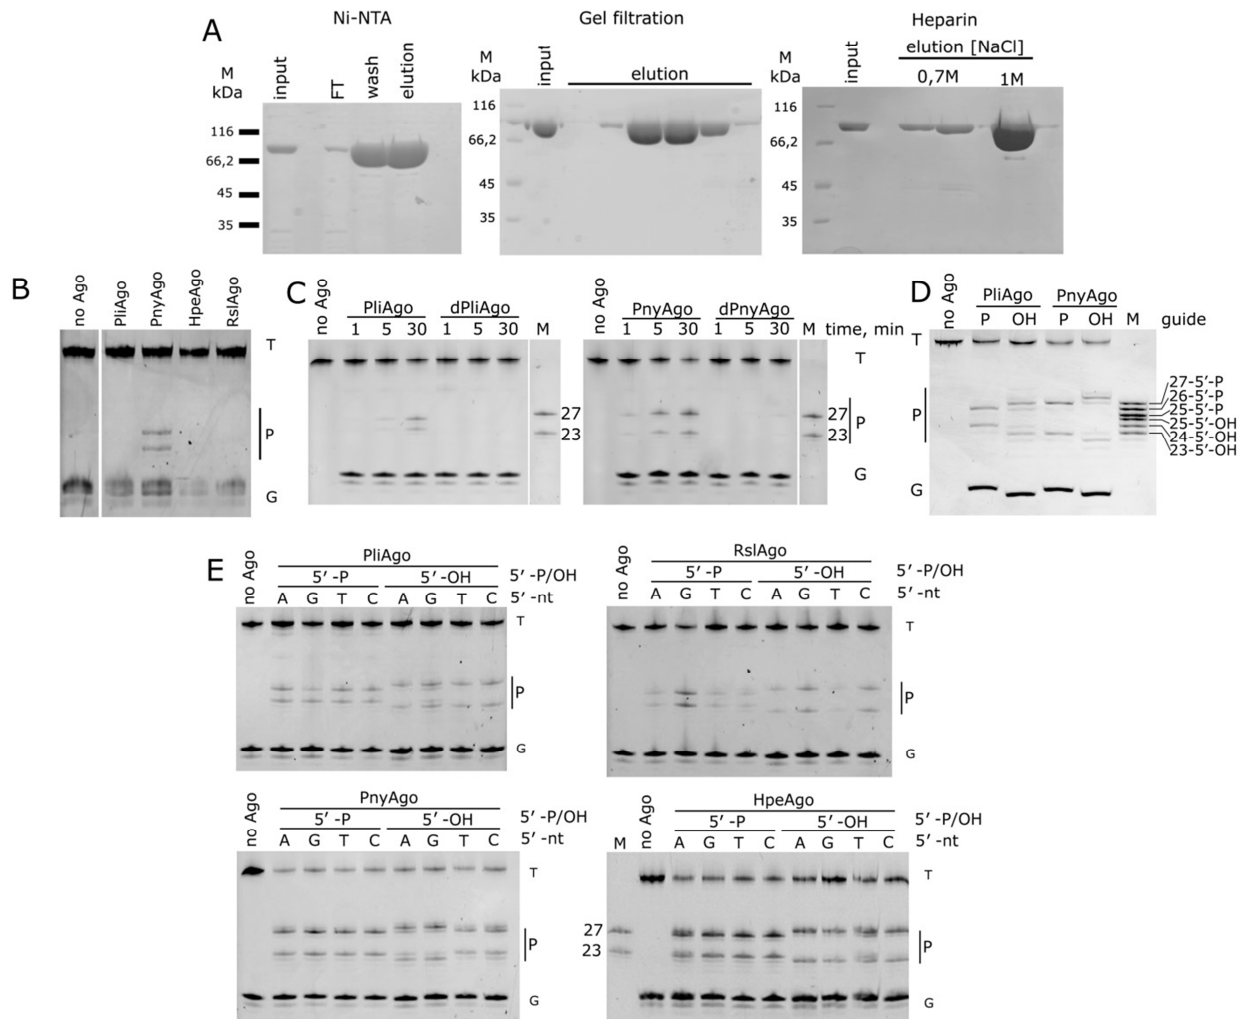

**Supplementary Fig. 2. Purification and characterization of D-R pAgos.** (A) Purification of PliAgo by Ni-NTA-affinity, Superose-6 gel filtration and heparin chromatography steps. For each step, the input and the elution fractions are shown (SDS-PAGE, Coomassie staining). Representative gels from two independent experiments are shown. (B) Analysis of target DNA cleavage by indicated pAgos after prolonged incubation (3 hours) at 37 °C (SYBR Gold staining). A representative gel from two independent experiments is shown. (C) Comparison of RNA cleavage by wild-type and catalytically dead dPliAgo (substitutions D563A, D626A) and dPnyAgo (D563A, D632A) (SYBR Gold staining). Representative gels from two independent experiments. (D) Determination of the position of the cleavage site for PliAgo and PnyAgo. Representative gel from two independent experiments. Synthetic oligonucleotides with the same sequence as the RNA target were used as size markers for the expected cleavage products corresponding to the 5'-part of the RNA target (23-5'-OH, 24-5'-OH and 25-5'-OH) and 5'-phosphorylated 3'-part of the target (27-5'-P, 26-5'-P, 25-5'-P) (lane M). The main cleavage products observed for PliAgo and PnyAgo coincide with the 24-5'-OH and 26-5'-P markers and 23-5'-OH and 27-5'-P markers, respectively, corresponding to cleavage between target positions 9' and 10' for PliAgo and positions 10' and 11' for PnyAgo. (E) Activities of the pAgo proteins with 5'-P and 5'-OH guide DNAs containing various 5' nucleotides. The results of a single experiment are shown. The reactions in panels were performed with 18 nt guide DNAs for 1 hour at 37 °C. Positions of targets ('T'), guides ('G') and reaction products ('P') are indicated.

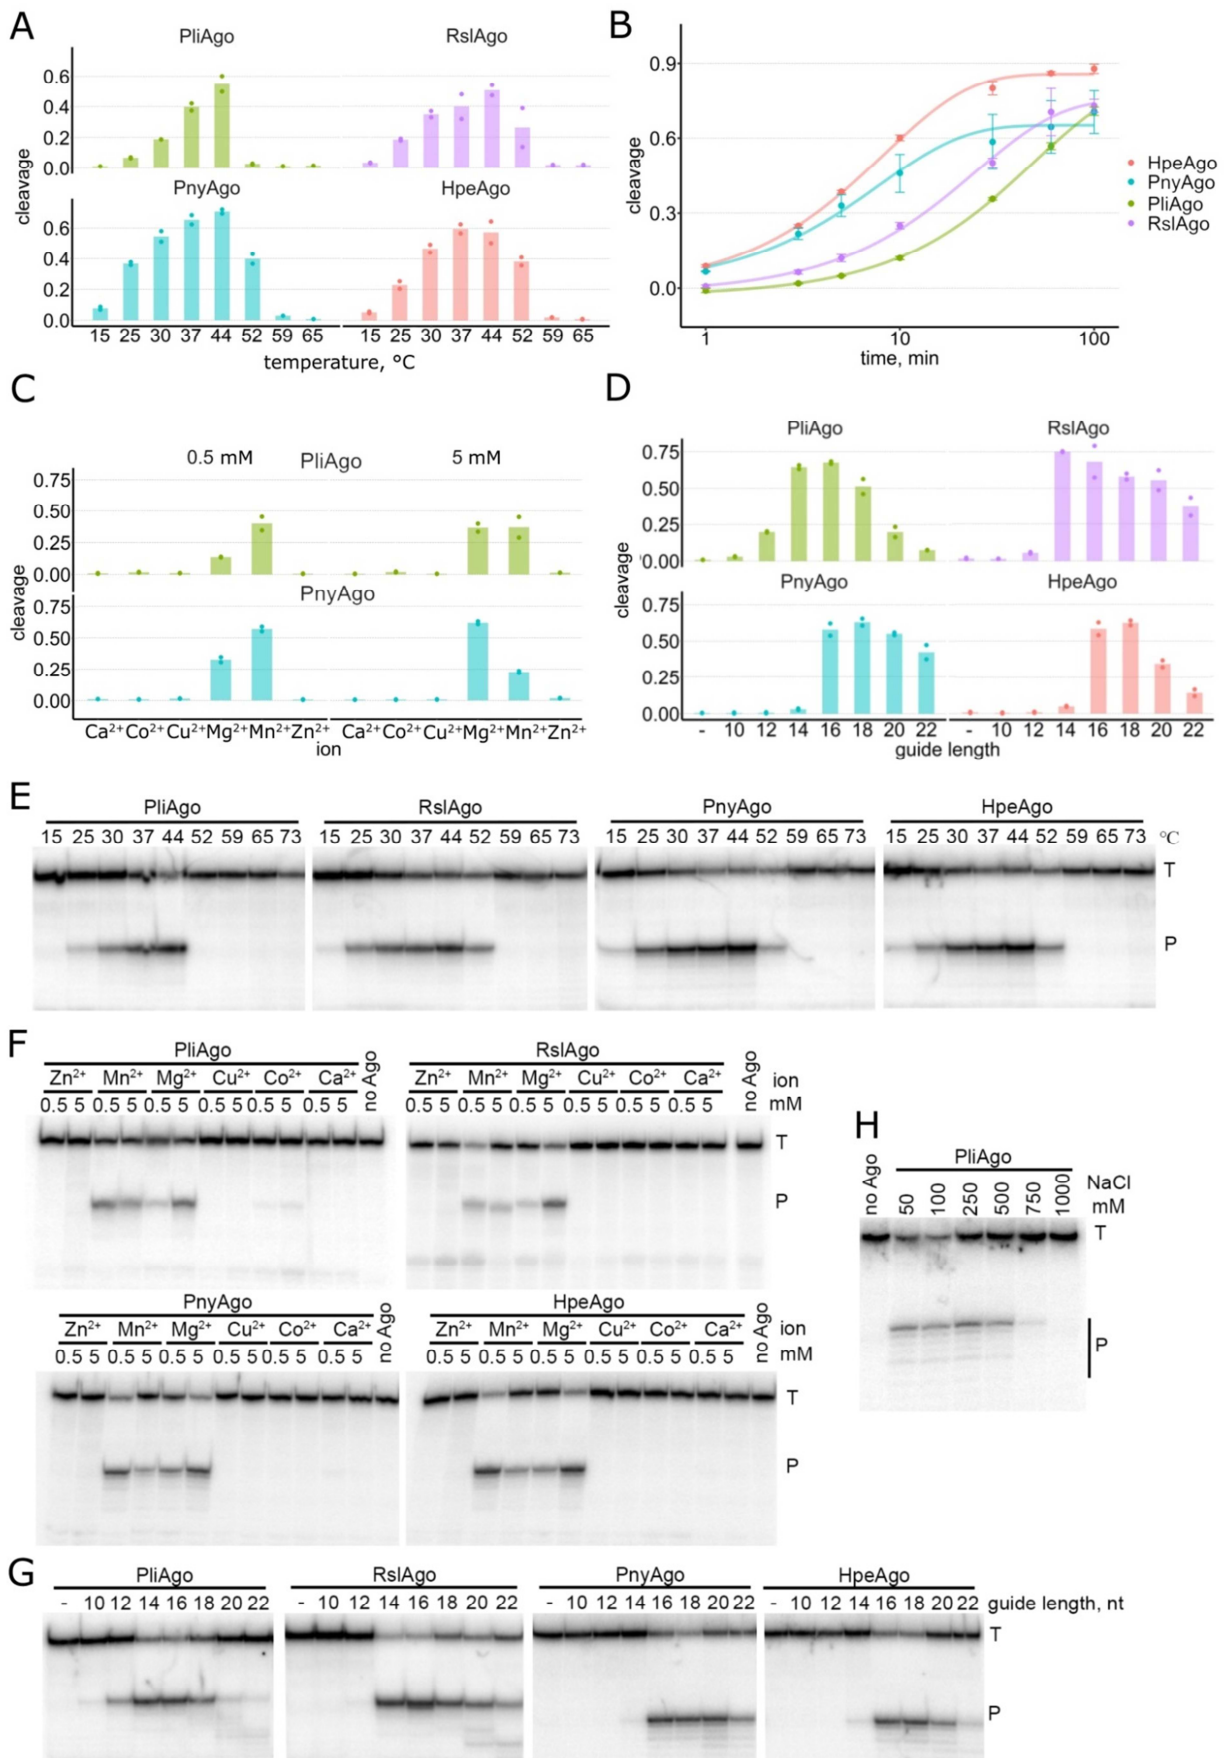



**Supplementary Fig. 3. Biochemical activities of D-R pAgos.** (A) and (E) Temperature dependence of the pAgo activity. (B) Kinetics of RNA cleavage by PliAgo, RslAgo, HpeAgo and PnyAgo under single-turnover conditions (500 nM pAgo, 200 nM guide DNA, 100 nM target RNA) at 37 °C. The rate constants for the cleavage reaction are  $0.020 \pm 0.002 \text{ min}^{-1}$  for PliAgo,  $0.040 \pm 0.005 \text{ min}^{-1}$  for RslAgo,  $0.12 \pm 0.02 \text{ min}^{-1}$  for PnyAgo and  $0.13 \pm 0.02 \text{ min}^{-1}$  for HpeAgo (0.95 confidence intervals). (C) and (F) Target RNA cleavage by PliAgo and PnyAgo with different divalent cations added to 0.5 mM or 5 mM concentrations. (D) and (G) Efficiency of RNA cleavage by the four pAgos with DNA guides of various lengths. (H) RNA cleavage by PliAgo at different concentrations of NaCl. Positions of targets ('T'), guides ('G') and reactions products ('P') are indicated. The reactions were performed with 18 nt guide DNAs (or with guides of various lengths) for 1 hour at 37 °C (or other temperatures) as indicated. In panels (A), (C) and (D), means from two independent experiments are shown. In panel (B), means from three independent experiments are shown; error bars correspond to standard deviations. In panels (E), (F), (G), (H), representative gels from two independent experiments are shown.

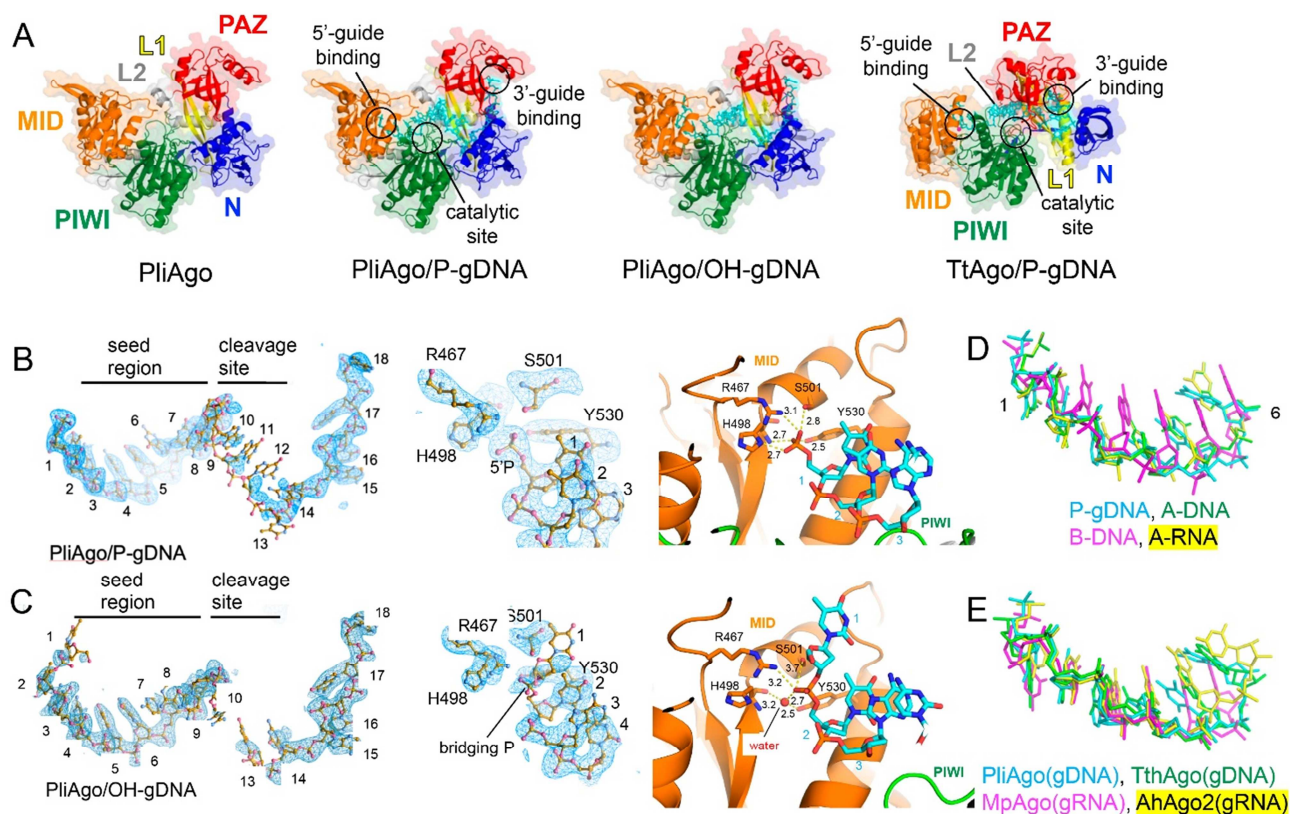

**Supplementary Fig. 4. X-ray crystal structures of PliAgo and its complexes with guide DNA.** (A) Comparison of X-ray crystal structures of PliAgo and TtAgo. X-ray crystal structures of PliAgo in the apo-form, in the complex with P-gDNA complex, in the complex with OH-gDNA and X-ray crystal structure of the TtAgo-gDNA-tDNA complex (PDB: 4NCA) are depicted as ribbon (Agos) and stick models (DNA) with partially transparent surfaces. Domains are colored and labelled as in Fig. 2. (B, C) PliAgo and gDNA interactions. (*Left*) Simulated annealing electron density omit maps (light blue mesh, sigma cutoff=4.5) of gDNA in the PliAgo/P-gDNA (B) and the PliAgo/OH-gDNA complexes (C) (overlaid with stick models of gDNA). Functional regions of gDNA are indicated. (*Middle*) Simulated annealing electron density omit maps (light blue mesh, omitted gDNA and amino acid residues around DNA) of the 5'-segment of gDNA in the PliAgo/P-gDNA (B) and the PliAgo/OH-gDNA complexes (C) (overlaid with stick models of gDNA and amino acid residues). (*Right*) Interactions of the MID domain (ribbon, orange) with the 5'-phosphate of gDNA (stick model) in PliAgo/P-gDNA (B) and the bridging phosphate of gDNA (stick model) in the PliAgo/OH-gDNA (C) complexes. The distances (Å) between the phosphate group, amino acid residues and water are indicated. (D) Overlay of the seed region (nucleotides 1-6) of gDNA in the PliAgo-P-gDNA complex (cyan) with A-form DNA (green), B-form DNA (magenta) and A-form RNA (yellow) using the DNA/RNA backbones. DNA and RNA structures were prepared by Coot. (E) Overlay of the seed region of gDNA in the PliAgo-P-gDNA complex (nucleotides 1-6, cyan) with gDNA in TtAgo (nucleotides 2-7, green; 3DLH), gRNA in hAgo2 (nucleotides 2-7, yellow; 4W5O) and gRNA in MpAgo (nucleotides 2-7, magenta; 5UX0) using the DNA/RNA backbones.

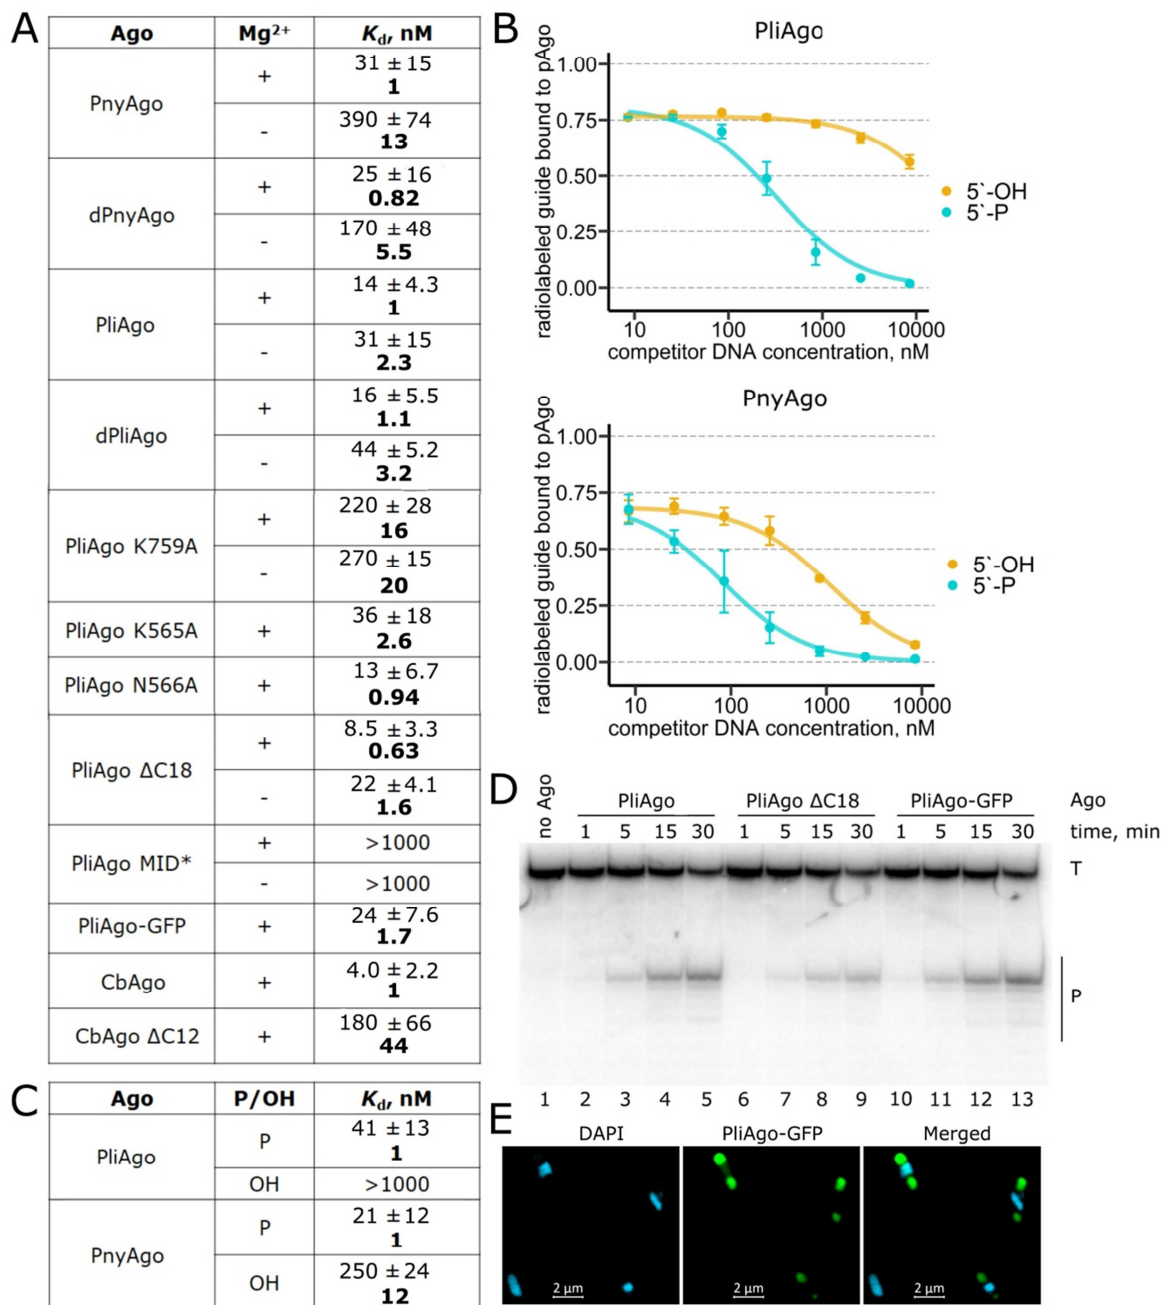

**Supplementary Fig. 5. Analysis of guide DNA binding by pAgo proteins and their mutant variants.** (A) Apparent  $K_d$  values for interactions of guide DNA with wild-type and mutant PnyAgo, PliAgo and CbAgo proteins measured in direct binding experiments by dot-blotting. Means and 0.95 confidence intervals from 3 or 4 independent experiments are shown. The numbers in bold show fold-changes in the apparent  $K_d$  values relative to wild-type pAgos. The data were used to calculate statistical significance (p-values) for the observed differences between  $K_d$ s for the wild-type and mutant pAgo variants, presented in the main manuscript text. P-values were calculated using the two-tailed Student t-test for independent variables without adjustments for multiple comparisons. (B) Competitive titration of 5'-P<sup>32</sup>-labeled guide DNA with unlabeled 5'-P or 5'-OH guides for PliAgo (top) and PnyAgo (bottom). The fraction of bound radiolabeled DNA is shown (the ratio of bound DNA to the total amount of labeled DNA in the sample). Means from 3 independent experiments are shown; error bars correspond to standard deviations. (C) Apparent  $K_d$  values for interactions of 5'-P and 5'-OH guide DNA with PliAgo and PnyAgo measured in competition experiments. Means and 0.95 confidence intervals from 3 independent experiments are shown. (D) Effects of mutations in the C-terminus of PliAgo on the kinetics of RNA cleavage. A representative gel from three independent experiments is shown. (E) Expression of PliAgo-GFP in *E. coli* cells, visualized by confocal microscopy (merged with DAPI staining of chromosomal DNA).

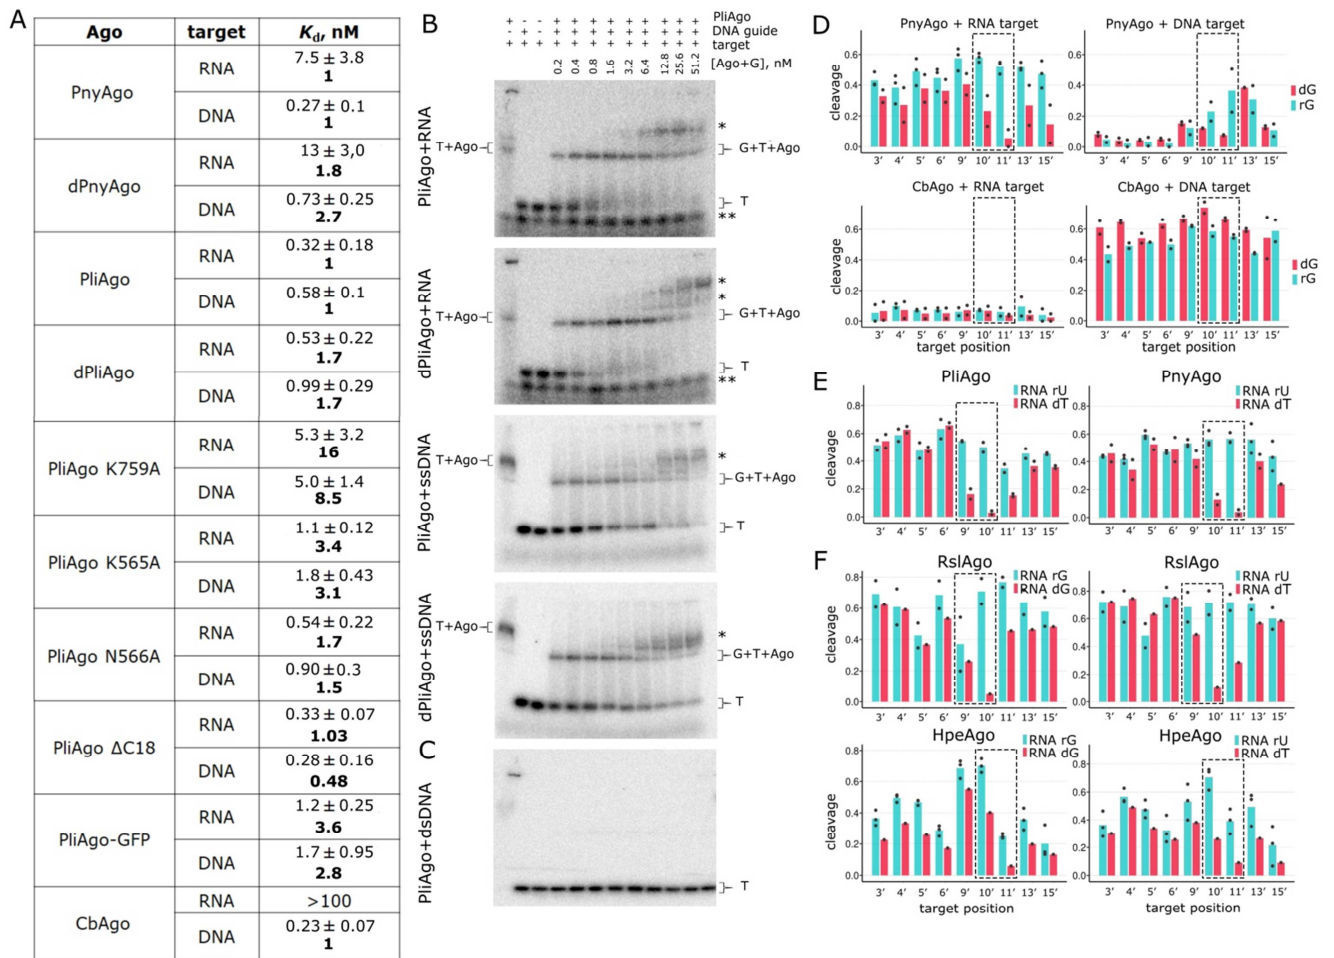

**Supplementary Fig. 6. Analysis of target RNA or DNA binding by binary guide-pAgo complexes.** (A) Apparent  $K_d$  values for the binding of target DNA or RNA ( $5'$ - $P^{32}$ -labeled) by wild-type and mutant pAgos measured by dot-blotting. Means and 0.95 confidence intervals from 3 independent experiments are shown. The numbers in bold show fold-changes in the apparent  $K_d$  values relative to wild-type pAgos. The data were used to calculate statistical significance ( $p$ -values) for the observed differences between  $K_d$ s for the wild-type and mutant pAgo variants, presented in the main manuscript text.  $P$ -values were calculated using the two-tailed Student  $t$ -test for independent variables without adjustments for multiple comparisons. (B) Analysis of the formation of ternary guide-target-pAgo complexes by EMSA (with  $5'$ - $P^{32}$ -labeled target RNA or ssDNA). Positions of free target RNA or DNA ('T'), nonspecific target-pAgo complexes (T+Ago) formed in the absence of guide DNA, and of ternary guide-target-pAgo complexes ('G+T+pAgo') are indicated. Single asterisks indicate higher molecule weight complexes observed at high concentrations of pAgo, which may be formed as a result of nonspecific binding of additional pAgo molecules to the ternary complex. Formation of the higher-order low mobility complexes may possibly explain why the efficiency of target RNA cleavage by PliAgo is <100% in the cleavage assays. Double asterisks indicate a high mobility band observed in the case of the RNA target that may possibly correspond to residual  $\gamma$ - $P^{32}$ -ATP used for target labeling or to a structured conformer of the RNA target not bound by PliAgo. (C) Analysis of interactions of PliAgo with dsDNA ( $5'$ - $P^{32}$ -labeled in the target strand) by EMSA. The double-stranded target was obtained by pre-annealing of ssDNA of the same sequence as in panel B with a complementary oligonucleotide. In panels (B) and (C), representative gels from 2 independent experiments are shown. (D) Effects of a single deoxyribonucleotide (dG) in the RNA target (left) and a single ribonucleotide (rG) in the DNA target (right) on target cleavage by PnyAgo and CbAgo, in comparison with control RNA and DNA targets. The reactions were performed with a set of differently positioned guide DNAs and a  $5'$ -labeled RNA target (see Supplementary Table 1 for oligonucleotide sequences). Position of the deoxyribonucleotide residue relative to the guide  $5'$ -end is indicated. The reactions were performed at  $37^\circ\text{C}$  for 30 minutes in the case of target RNA and for 3 hours in the case of target DNA. In each reaction, the cleavage efficiency was calculated as the ratio of the cleaved RNA product to

the sum of the product and unreacted target. For PnyAgo, considerable cleavage of the control DNA target is also observed with several guides (for positions 9'-15', upper right panel), confirming that it can cleave DNA under certain conditions (see Supplementary Fig. 2B). (E) Target RNA cleavage by PliAgo and PnyAgo for an RNA target containing a single deoxythymidine (dU) residue at indicated positions, in comparison with a control template (rU). (F) Effects of single deoxyribonucleotides (dG, left; dU, right) in the RNA target on its cleavage by RslAgo and HpeAgo, in comparison with corresponding control RNA targets. Target positions around the cleavage site for each pAgo are shown with dotted boxes. The reactions were performed at 37 °C for 30 minutes in the case of RslAgo and 10 minutes in the case of HpeAgo. In panels (D), (E), (F), means from 2-3 independent measurements are shown (the number of measurements is shown as individual data points on each graph).



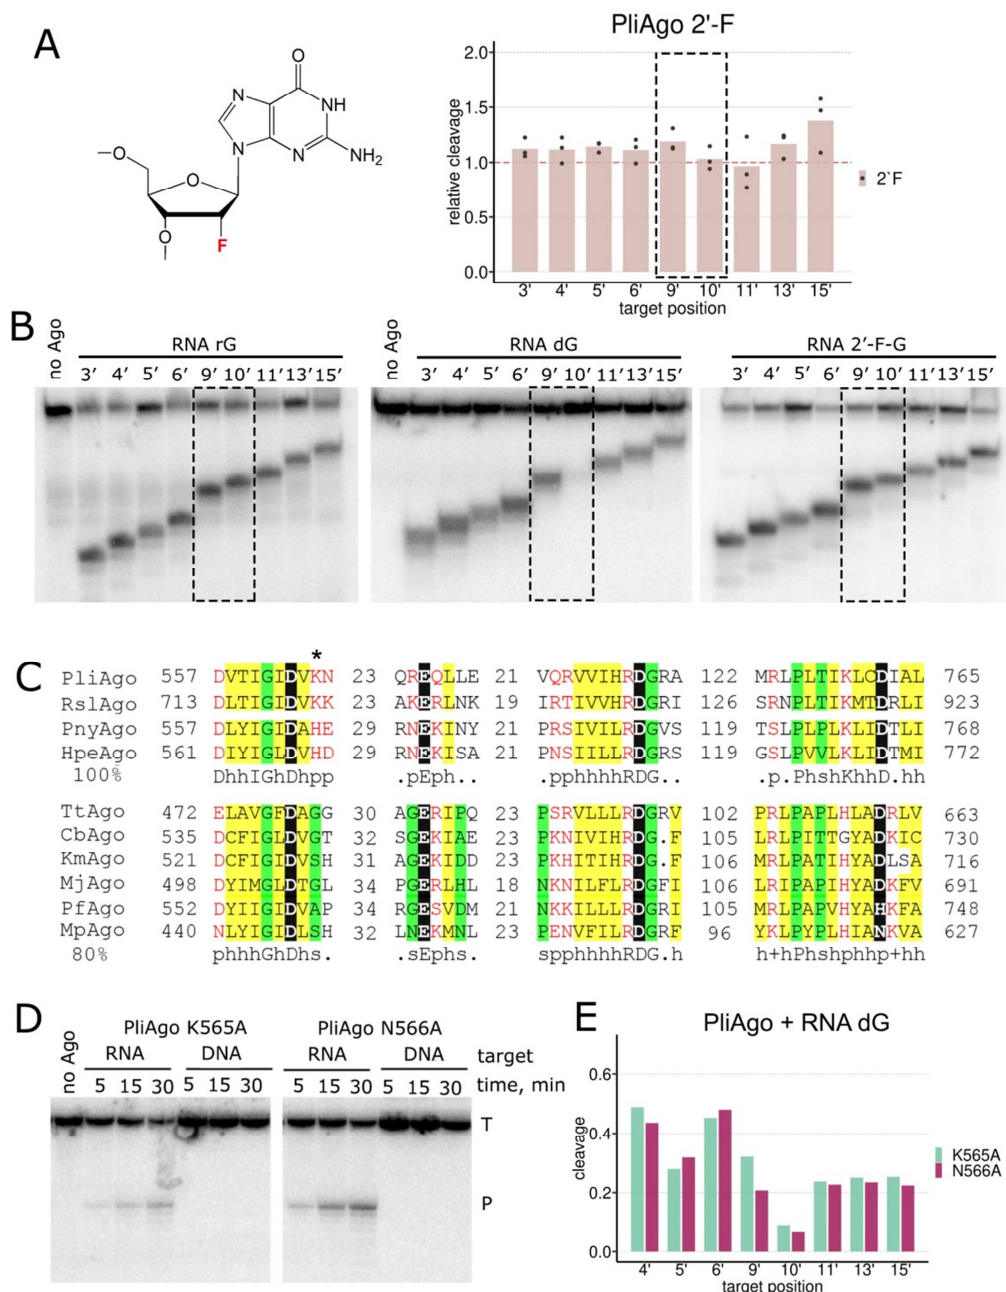

**Supplementary Fig. 7. Effects of the 2'-fluoro modification and of PliAgo mutations on target cleavage.** (A) Analysis of the effect of the 2'-F-guanosine modification (shown on the left) on the efficiency of RNA cleavage relative to the unmodified RNA target (right). Means from 3 independent measurements are shown. (B) Electrophoretic analysis of the cleavage products of modified RNAs containing 2'-dG or 2'-F-G at indicated positions by PliAgo in comparison with the control unmodified target (rG) (representative gels from 3 independent experiments). The reactions were performed with 5'-P<sup>32</sup>-labeled target RNA and differently positioned guide DNAs, resulting in different positioning of the modified residues relative to the active site (see Fig. 4 and Supplementary Table 1). (C) The consensus sequence of the active site in the PIWI domain in the two groups of D-R pAgos and in previously analysed pAgos. The coloring is based on the consensus shown underneath the alignment (see Fig. 3 for color scheme). The catalytic tetrad residues are shown in black, the PliAgo-specific residue K565 is indicated with an asterisk. (D) Analysis of target RNA and DNA cleavage by the K565A and N566A mutants of PliAgo. The results of a single experiment are shown. (E) Cleavage of the RNA target containing a single deoxyribonucleotide (dG) at indicated positions (defined by guide DNAs) by the K565A and N566A mutants. The results of a single experiment are shown. The reaction was performed at 37 °C for 30 minutes. Target positions around the cleavage site are shown with dotted boxes.

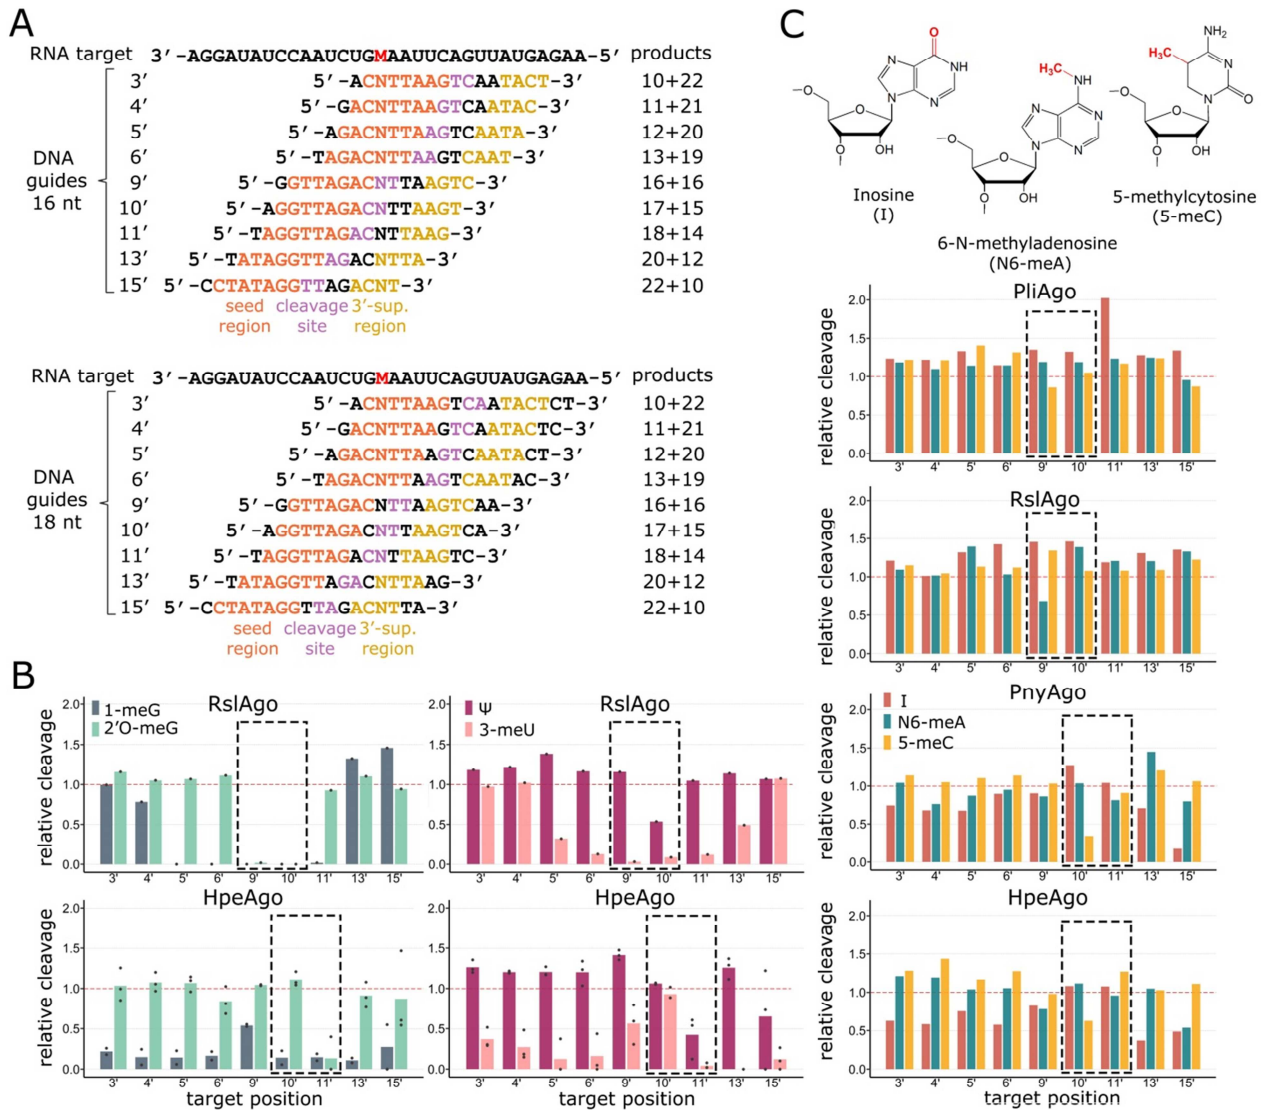

**Supplementary Fig. 8. Effects of site-specific modifications on target RNA cleavage by pAgos.** (A) RNA targets containing modified nucleotides (M) and differently positioned DNA guides used in the cleavage reactions. 'N' indicates complementary nucleotide depending on the type of modification. The functional regions in guide DNA (seed, central and 3'-supplementary) are indicated. The experiments were performed with 16 nt guide DNAs (top) for PliAgo and RslAgo and 18 nt guide DNAs (bottom) for PnyAgo and HpeAgo. (B) Effects of the 1-meG, 2'O-meG, Ψ and 3-meU modifications on target RNA cleavage by RslAgo and HpeAgo. For RslAgo, the results of a single experiment are presented; for HpeAgo, means from 3 independent measurements are shown. (C) Analysis of target RNA cleavage with the I, N<sup>6</sup>-meA and 5-meC modifications (shown on the top) by PliAgo, RslAgo, PnyAgo and HpeAgo. For each position, the efficiency of cleavage of modified RNA relative to the efficiency of cleavage of control RNA measured with the same guide DNA ('relative cleavage'), is shown. In panel (C), the experiment was performed one time for each pAgo. Target positions around the cleavage site are shown with dotted boxes.

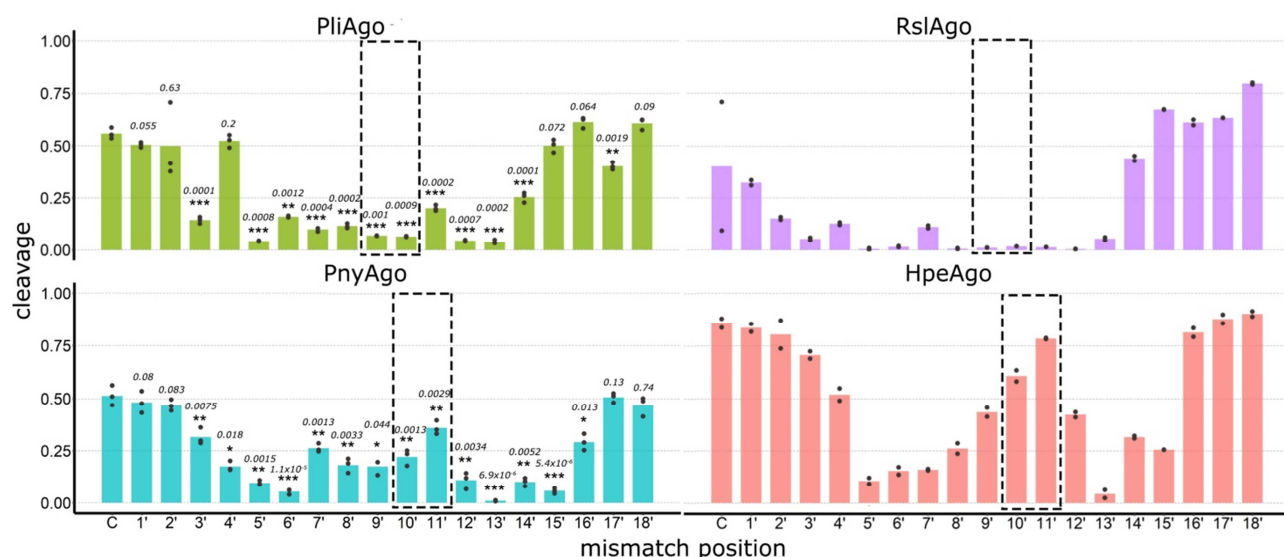

**Supplementary Fig. 9. Effects of single-nucleotide mismatches on target RNA cleavage by pAgos.** Quantification of the effects of mismatches on the efficiency of target RNA cleavage by D-R pAgos (Fig. 6). Target positions around the cleavage site are shown with dotted boxes. For each guide DNA, cleavage efficiencies were calculated as the ratio of the amounts of reaction products to the sum of reaction products and unreacted RNA. Means from 3 (for PliAgo and PnyAgo) or 2 (for RslAgo and HpeAgo) independent experiments are shown. For PliAgo and PnyAgo, significant changes in the cleavage efficiencies in comparison with the fully complementary control guide DNA ('C') are indicated (p-values: \* $<0.05$ ; \*\* $<0.01$ ; \*\*\* $<0.001$ ; the exact p-values for individual mismatches are indicated on the figure). The p-values were calculated by the two-tailed Student t-test for independent variables without adjustments for multiple comparisons.

**Supplementary Table 1. Sequences of oligonucleotides.**

| <b>Cleavage and binding assays</b> |                      |                                                                            |                                                                       |
|------------------------------------|----------------------|----------------------------------------------------------------------------|-----------------------------------------------------------------------|
|                                    | Oligonucleotide name | Sequence (5'-3')                                                           | Description                                                           |
| 1.                                 | G-guide-DNA          | GTTAGACTTTAAGTCAAT                                                         | 18 nt guide DNA with 5'-G, complementary to G-target                  |
| 2.                                 | A-guide-DNA          | ATTAGACTTTAAGTCAAT                                                         | 18 nt guide DNA with 5'-A, complementary to G-target                  |
| 3.                                 | T-guide-DNA          | TTTAGACTTTAAGTCAAT                                                         | 18 nt guide DNA with 5'-T, complementary to G-target                  |
| 4.                                 | C-guide-DNA          | CTTAGACTTTAAGTCAAT                                                         | 18 nt guide DNA with 5'-C, complementary to G-target                  |
| 5.                                 | G-target-DNA         | TTTATCAAAAAGAGT <u>ATTGA</u><br><u>CTTAAAGTCTAAC</u> CTATAGG<br>ATACTTACAG | 50 nt target DNA for the guide/target specificity assay               |
| 6.                                 | G-guide-RNA          | GUUAGACUUUAAGUCAAU                                                         | 18 nt guide RNA for the guide/target specificity assay                |
| 7.                                 | G-target-RNA         | UUUAUCAAAAAGAGU <u>AUUG</u><br><u>ACUUAAGUCUAAC</u> CUAUA<br>GGAUACUUACAG  | 50 nt target RNA for the guide/target specificity assay               |
| 8.                                 | G-guide-10nt         | GTTAGACTTT                                                                 | 10 nt guide with 5'-G, complementary to G-target                      |
| 9.                                 | G-guide-12nt         | GTTAGACTTTAA                                                               | 12 nt guide with 5'-G, complementary to G-target                      |
| 10.                                | G-guide-14nt         | GTTAGACTTTAAGT                                                             | 14 nt guide with 5'-G, complementary to G-target                      |
| 11.                                | G-guide-16nt         | GTTAGACTTTAAGTCA                                                           | 16 nt guide with 5'-G, complementary to G-target                      |
| 12.                                | G-guide-20nt         | GTTAGACTTTAAGTCAATAC                                                       | 20 nt guide with 5'-G, complementary to G-target                      |
| 13.                                | G-guide-22nt         | GTTAGACTTTAAGTCAATAC<br>TC                                                 | 22 nt guide with 5'-G, complementary to G-target                      |
| 14.                                | Marker_5_RNA23       | UUUAUCAAAAAGAGU <u>AUUG</u><br>ACUU                                        | 23 nt RNA used as RNA marker                                          |
| 15.                                | Marker_5_RNA24       | UUUAUCAAAAAGAGU <u>AUUG</u><br>ACUUA                                       | 24 nt RNA used as RNA marker                                          |
| 16.                                | Marker_5_RNA25       | UUUAUCAAAAAGAGU <u>AUUG</u><br>ACUUA                                       | 25 nt RNA used as RNA marker                                          |
| 17.                                | Marker_3_RNA25       | AGUCUAACCU <u>AUAGGAUAC</u><br>UUACAG                                      | 25 nt RNA used as RNA marker                                          |
| 18.                                | Marker_3_RNA26       | AAGUCUAACCU <u>AUAGGAUA</u><br>CUUACAG                                     | 26 nt RNA used as RNA marker                                          |
| 19.                                | Marker_3_RNA27       | AAAGUCUAACCU <u>AUAGGAU</u><br>ACUUACAG                                    | 27 nt RNA used as RNA marker                                          |
| <b>Crystallization</b>             |                      |                                                                            |                                                                       |
| 20.                                | 3D-guide             | TTACTGCACAGGTGACGA                                                         | 18 nt guide with 5'-T used for crystallization                        |
| 21.                                | 3D-target-RNA        | CUGUCGUCACCUGUGCAG<br>UAACUG                                               | 24 nt target RNA for 3D-guide, tested in crystallization trials       |
| 22.                                | 3D-target-DNA        | CATCTAGTAACTGCTGTCGT<br>CACCTGTGCAGTAACTGAG<br>TCATGGACTAA                 | 50 nt target DNA for 3D-guide, used in the cleavage assay in Fig. S2B |
| <b>Mismatch assay</b>              |                      |                                                                            |                                                                       |
| 23.                                | G-guide_mm1          | <u>C</u> TTAGACTTTAAGTCAAT                                                 | guide forms mismatched pair in                                        |

|                            |               |                                                                                  |                                                          |
|----------------------------|---------------|----------------------------------------------------------------------------------|----------------------------------------------------------|
|                            |               |                                                                                  | position 1 with G-target                                 |
| 24.                        | G-guide_mm2   | G <u>A</u> TAGACTTTAAGTCAAT                                                      | guide forms mismatched pair in position 2 with G-target  |
| 25.                        | G-guide_mm3   | GT <u>A</u> AGACTTTAAGTCAAT                                                      | guide forms mismatched pair in position 3 with G-target  |
| 26.                        | G-guide_mm4   | GTT <u>I</u> GACTTTAAGTCAAT                                                      | guide forms mismatched pair in position 4 with G-target  |
| 27.                        | G-guide_mm5   | GTTA <u>C</u> ACTTTAAGTCAAT                                                      | guide forms mismatched pair in position 5 with G-target  |
| 28.                        | G-guide_mm6   | GTTAG <u>I</u> CTTTAAGTCAAT                                                      | guide forms mismatched pair in position 6 with G-target  |
| 29.                        | G-guide_mm7   | GTTAGAG <u>T</u> TTAAGTCAAT                                                      | guide forms mismatched pair in position 7 with G-target  |
| 30.                        | G-guide_mm8   | GTTAGAC <u>A</u> TTAAGTCAAT                                                      | guide forms mismatched pair in position 8 with G-target  |
| 31.                        | G-guide_mm9   | GTTAGACT <u>A</u> TAAAGTCAAT                                                     | guide forms mismatched pair in position 9 with G-target  |
| 32.                        | G-guide_mm10  | GTTAGACTT <u>A</u> AAGTCAAT                                                      | guide forms mismatched pair in position 10 with G-target |
| 33.                        | G-guide_mm11  | GTTAGACTTTT <u>I</u> AGTCAAT                                                     | guide forms mismatched pair in position 11 with G-target |
| 34.                        | G-guide_mm12  | GTTAGACTTTT <u>I</u> GTCAAT                                                      | guide forms mismatched pair in position 12 with G-target |
| 35.                        | G-guide_mm13  | GTTAGACTTTT <u>A</u> C <u>T</u> CAAT                                             | guide forms mismatched pair in position 13 with G-target |
| 36.                        | G-guide_mm14  | GTTAGACTTTT <u>A</u> AG <u>A</u> CAAT                                            | guide forms mismatched pair in position 14 with G-target |
| 37.                        | G-guide_mm15  | GTTAGACTTTT <u>A</u> AGTGAAT                                                     | guide forms mismatched pair in position 15 with G-target |
| 38.                        | G-guide_mm16  | GTTAGACTTTT <u>A</u> AGT <u>C</u> IAT                                            | guide forms mismatched pair in position 16 with G-target |
| 39.                        | G-guide_mm17  | GTTAGACTTTT <u>A</u> AGTCA <u>I</u> T                                            | guide forms mismatched pair in position 17 with G-target |
| 40.                        | G-guide_mm18  | GTTAGACTTTT <u>A</u> AGTCAA <u>A</u>                                             | guide forms mismatched pair in position 18 with G-target |
| <b>Modifications assay</b> |               |                                                                                  |                                                          |
| 41.                        | RNA_t_rA      | AAGAGU <u>A</u> UUGACU <u>A</u> AAAGU<br>CUAACC <u>A</u> UAGGA                   | 32 nt RNA target with A in position 17                   |
| 42.                        | RNA_t_rU      | AAGAGU <u>U</u> UUGACU <u>U</u> AAUGU<br>CUAACC <u>U</u> UAGGA                   | 32 nt RNA target with U in position 17                   |
| 43.                        | RNA_t_rG      | AAGAGU <u>G</u> UUGACU <u>G</u> AAAGU<br>CUAACC <u>G</u> UAGGA                   | 32 nt RNA target with G in position 17                   |
| 44.                        | RNA_t_rC      | AAGAGU <u>C</u> UUGACU <u>C</u> AAAGU<br>CUAACC <u>C</u> UAGGA                   | 32 nt RNA target with C in position 17                   |
| 45.                        | RNA_t_I       | AAGAGU <u>I</u> UUGACU <u>I</u> AAAGU<br>CUAACC <u>I</u> UAGGA                   | 32 nt RNA target with I in position 17                   |
| 46.                        | RNA_t_N6-meA  | AAGAGU <u>N6-meA</u> UUGACU <u>N6-meA</u> AAAGU<br>CUAACC <u>N6-meA</u> UAGGA    | 32 nt RNA target with N6-meA in position 17              |
| 47.                        | RNA_t_5-meC   | AAGAGU <u>5-meC</u> UUGACU <u>5-meC</u> AAAGU<br>CUAACC <u>5-meC</u> UAGGA       | 32 nt RNA target with 5-meC in position 17               |
| 48.                        | RNA_t_Ψ       | AAGAGU <u>Ψ</u> UUGACU <u>Ψ</u> AAAGU<br>CUAACC <u>Ψ</u> UAGGA                   | 32 nt RNA target with Ψ in position 17                   |
| 49.                        | RNA_t_2'O-meG | AAGAGU <u>2'O-meG</u> UUGACU <u>2'O-meG</u> AAAGU<br>CUAACC <u>2'O-meG</u> UAGGA | 32 nt RNA target with 2'-OmeG in position 17             |



|     |              |                                                  |                                                                         |
|-----|--------------|--------------------------------------------------|-------------------------------------------------------------------------|
|     |              | <b>meG</b> )GUCUAACCUAUAGGA                      | position 17                                                             |
| 50. | RNA_t_2'F-G  | AAGAGUAUUGACUAAA( <b>2'-F-G</b> )GUCUAACCUAUAGGA | 32 nt RNA target with 2'- F-G in position 17                            |
| 51. | RNA_t_1-meG  | AAGAGUAUUGACUAAA( <b>1-meG</b> )GUCUAACCUAUAGGA  | 32 nt RNA target with 1-meG in position 17                              |
| 52. | RNA_t_3-meU  | AAGAGUAUUGACUAAA( <b>3-meU</b> )GUCUAACCUAUAGGA  | 32 nt RNA target with 3-meU in position 17                              |
| 53. | RNA_t_dG     | AAGAGUAUUGACUAAA <b>dGG</b> UCUAACCUAUAGGA       | 32 nt RNA target with dG in position 17                                 |
| 54. | RNA_t_dU     | AAGAGUAUUGACUAAA <b>dTG</b> UCUAACCUAUAGGA       | 32 nt RNA target with dT in position 17                                 |
| 55. | DNA_t_rG     | AAGAGTATTGACTTAA <b>rGGT</b> CTAACCTATAGGA       | 32 nt DNA target with rG in position 17                                 |
| 56. | DNA_t_dG     | AAGAGTATTGACTTAA <b>GGTC</b> TAACCTATAGGA        | 32 nt DNA target with G in position 17                                  |
| 57. | gDNA_18_3_A  | AC <b>ATTA</b> AGTCAATACTCT                      | 18 nt DNA guide with A in position 3 opposite the site of modification  |
| 58. | gDNA_18_4_A  | GAC <b>ATTA</b> AGTCAATACTC                      | 18 nt DNA guide with A in position 4 opposite the site of modification  |
| 59. | gDNA_18_5_A  | AGAC <b>ATTA</b> AGTCAATACT                      | 18 nt DNA guide with A in position 5 opposite the site of modification  |
| 60. | gDNA_18_6_A  | TAGAC <b>ATTA</b> AGTCAATAC                      | 18 nt DNA guide with A in position 6 opposite the site of modification  |
| 61. | gDNA_18_9_A  | GGTTAGAC <b>ATTA</b> AGTCAA                      | 18 nt DNA guide with A in position 9 opposite the site of modification  |
| 62. | gDNA_18_10_A | AGGTTAGAC <b>ATTA</b> AGTCA                      | 18 nt DNA guide with A in position 10 opposite the site of modification |
| 63. | gDNA_18_11_A | TAGGTTAGAC <b>ATTA</b> AGTC                      | 18 nt DNA guide with A in position 11 opposite the site of modification |
| 64. | gDNA_18_13_A | TATAGGTTAGAC <b>ATTA</b> AG                      | 18 nt DNA guide with A in position 13 opposite the site of modification |
| 65. | gDNA_18_15_A | CCTATAGGTTAGAC <b>ATTA</b>                       | 18 nt DNA guide with A in position 15 opposite the site of modification |
| 66. | gDNA_18_3_T  | ACTTTAAGTCAATACTCT                               | 18 nt DNA guide with T in position 3 opposite the site of modification  |
| 67. | gDNA_18_4_T  | GACTTTAAGTCAATACTC                               | 18 nt DNA guide with T in position 4 opposite the site of modification  |
| 68. | gDNA_18_5_T  | AGACTTTAAGTCAATACT                               | 18 nt DNA guide with T in position 5 opposite the site of modification  |
| 69. | gDNA_18_6_T  | TAGACTTTAAGTCAATAC                               | 18 nt DNA guide with T in position 6 opposite the site of modification  |
| 70. | gDNA_18_9_T  | GGTTAGACTTTAAGTCAA                               | 18 nt DNA guide with T in position 9 opposite the site of modification  |
| 71. | gDNA_18_10_T | AGGTTAGACTTTAAGTCA                               | 18 nt DNA guide with T in position 10 opposite the site of modification |
| 72. | gDNA_18_11_T | TAGGTTAGACTTTAAGTC                               | 18 nt DNA guide with T in position 11 opposite the site of modification |
| 73. | gDNA_18_13_T | TATAGGTTAGACTTTAAG                               | 18 nt DNA guide with T in position 13 opposite the site of modification |
| 74. | gDNA_18_15_T | CCTATAGGTTAGACTTTA                               | 18 nt DNA guide with T in position 15 opposite the site of modification |
| 75. | gDNA_18_3_G  | AC <b>GTTA</b> AGTCAATACTCT                      | 18 nt DNA guide with G in position 3 opposite the site of modification  |

|      |              |                             |                                                                         |
|------|--------------|-----------------------------|-------------------------------------------------------------------------|
| 76.  | gDNA_18_4_G  | GAC <b>G</b> TTAAGTCAATACTC | 18 nt DNA guide with G in position 4 opposite the site of modification  |
| 77.  | gDNA_18_5_G  | AGAC <b>G</b> TTAAGTCAATACT | 18 nt DNA guide with G in position 5 opposite the site of modification  |
| 78.  | gDNA_18_6_G  | TAGAC <b>G</b> TTAAGTCAATAC | 18 nt DNA guide with G in position 6 opposite the site of modification  |
| 79.  | gDNA_18_9_G  | GGTTAGAC <b>G</b> TTAAGTCAA | 18 nt DNA guide with G in position 9 opposite the site of modification  |
| 80.  | gDNA_18_10_G | AGGTTAGAC <b>G</b> TTAAGTCA | 18 nt DNA guide with G in position 10 opposite the site of modification |
| 81.  | gDNA_18_11_G | TAGGTTAGAC <b>G</b> TTAAGTC | 18 nt DNA guide with G in position 11 opposite the site of modification |
| 82.  | gDNA_18_13_G | TATAGGTTAGAC <b>G</b> TTAAG | 18 nt DNA guide with G in position 13 opposite the site of modification |
| 83.  | gDNA_18_15_G | CCTATAGGTTAGAC <b>G</b> TTA | 18 nt DNA guide with G in position 15 opposite the site of modification |
| 84.  | gDNA_18_3_C  | AC <b>C</b> TTAAGTCAATACTCT | 18 nt DNA guide with C in position 3 opposite the site of modification  |
| 85.  | gDNA_18_4_C  | GAC <b>C</b> TTAAGTCAATACTC | 18 nt DNA guide with C in position 4 opposite the site of modification  |
| 86.  | gDNA_18_5_C  | AGAC <b>C</b> TTAAGTCAATACT | 18 nt DNA guide with C in position 5 opposite the site of modification  |
| 87.  | gDNA_18_6_C  | TAGAC <b>C</b> TTAAGTCAATAC | 18 nt DNA guide with C in position 6 opposite the site of modification  |
| 88.  | gDNA_18_9_C  | GGTTAGAC <b>C</b> TTAAGTCAA | 18 nt DNA guide with C in position 9 opposite the site of modification  |
| 89.  | gDNA_18_10_C | AGGTTAGAC <b>C</b> TTAAGTCA | 18 nt DNA guide with C in position 10 opposite the site of modification |
| 90.  | gDNA_18_11_C | TAGGTTAGAC <b>C</b> TTAAGTC | 18 nt DNA guide with C in position 11 opposite the site of modification |
| 91.  | gDNA_18_13_C | TATAGGTTAGAC <b>C</b> TTAAG | 18 nt DNA guide with C in position 13 opposite the site of modification |
| 92.  | gDNA_18_15_C | CCTATAGGTTAGAC <b>C</b> TTA | 18 nt DNA guide with C in position 15 opposite the site of modification |
| 93.  | gDNA_16_3_A  | AC <b>A</b> TTAAGTCAATACT   | 16 nt DNA guide with A in position 3 opposite the site of modification  |
| 94.  | gDNA_16_4_A  | GAC <b>A</b> TTAAGTCAATAC   | 16 nt DNA guide with A in position 4 opposite the site of modification  |
| 95.  | gDNA_16_5_A  | AGAC <b>A</b> TTAAGTCAATA   | 16 nt DNA guide with A in position 5 opposite the site of modification  |
| 96.  | gDNA_16_6_A  | TAGAC <b>A</b> TTAAGTCAAT   | 16 nt DNA guide with A in position 6 opposite the site of modification  |
| 97.  | gDNA_16_9_A  | GGTTAGAC <b>A</b> TTAAGTC   | 16 nt DNA guide with A in position 9 opposite the site of modification  |
| 98.  | gDNA_16_10_A | AGGTTAGAC <b>A</b> TTAAGT   | 16 nt DNA guide with A in position 10 opposite the site of modification |
| 99.  | gDNA_16_11_A | TAGGTTAGAC <b>A</b> TTAAG   | 16 nt DNA guide with A in position 11 opposite the site of modification |
| 100. | gDNA_16_13_A | TATAGGTTAGAC <b>A</b> TTA   | 16 nt DNA guide with A in position 13 opposite the site of modification |
| 101. | gDNA_16_15_A | CCTATAGGTTAGAC <b>A</b> T   | 16 nt DNA guide with A in position 15 opposite the site of modification |
| 102. | gDNA_16_3_T  | AC <b>T</b> TTAAGTCAATACT   | 16 nt DNA guide with T in position 3 opposite the site of modification  |

|      |              |                           |                                                                         |
|------|--------------|---------------------------|-------------------------------------------------------------------------|
| 103. | gDNA_16_4_T  | GACTTTAAGTCAATAC          | 16 nt DNA guide with T in position 4 opposite the site of modification  |
| 104. | gDNA_16_5_T  | AGACTTTAAGTCAATA          | 16 nt DNA guide with T in position 5 opposite the site of modification  |
| 105. | gDNA_16_6_T  | TAGACTTTAAGTCAAT          | 16 nt DNA guide with T in position 6 opposite the site of modification  |
| 106. | gDNA_16_9_T  | GGTTAGACTTTAAGTC          | 16 nt DNA guide with T in position 9 opposite the site of modification  |
| 107. | gDNA_16_10_T | AGGTTAGACTTTAAGT          | 16 nt DNA guide with T in position 10 opposite the site of modification |
| 108. | gDNA_16_11_T | TAGGTTAGACTTTAAG          | 16 nt DNA guide with T in position 11 opposite the site of modification |
| 109. | gDNA_16_13_T | TATAGGTTAGACTTTA          | 16 nt DNA guide with T in position 13 opposite the site of modification |
| 110. | gDNA_16_15_T | CCTATAGGTTAGACTT          | 16 nt DNA guide with T in position 15 opposite the site of modification |
| 111. | gDNA_16_3_G  | AC <b>G</b> TTAAGTCAATACT | 16 nt DNA guide with G in position 3 opposite the site of modification  |
| 112. | gDNA_16_4_G  | GAC <b>G</b> TTAAGTCAATAC | 16 nt DNA guide with G in position 4 opposite the site of modification  |
| 113. | gDNA_16_5_G  | AGAC <b>G</b> TTAAGTCAATA | 16 nt DNA guide with G in position 5 opposite the site of modification  |
| 114. | gDNA_16_6_G  | TAGAC <b>G</b> TTAAGTCAAT | 16 nt DNA guide with G in position 6 opposite the site of modification  |
| 115. | gDNA_16_9_G  | GGTTAGAC <b>G</b> TTAAGTC | 16 nt DNA guide with G in position 9 opposite the site of modification  |
| 116. | gDNA_16_10_G | AGGTTAGAC <b>G</b> TTAAGT | 16 nt DNA guide with G in position 10 opposite the site of modification |
| 117. | gDNA_16_11_G | TAGGTTAGAC <b>G</b> TTAAG | 16 nt DNA guide with G in position 11 opposite the site of modification |
| 118. | gDNA_16_13_G | TATAGGTTAGAC <b>G</b> TTA | 16 nt DNA guide with G in position 13 opposite the site of modification |
| 119. | gDNA_16_15_G | CCTATAGGTTAGAC <b>G</b> T | 16 nt DNA guide with G in position 15 opposite the site of modification |
| 120. | gDNA_16_3_C  | AC <b>C</b> TTAAGTCAATACT | 16 nt DNA guide with C in position 3 opposite the site of modification  |
| 121. | gDNA_16_4_C  | GAC <b>C</b> TTAAGTCAATAC | 16 nt DNA guide with C in position 4 opposite the site of modification  |
| 122. | gDNA_16_5_C  | AGAC <b>C</b> TTAAGTCAAT  | 16 nt DNA guide with C in position 5 opposite the site of modification  |
| 123. | gDNA_16_6_C  | TAGAC <b>C</b> TTAAGTCAAT | 16 nt DNA guide with C in position 6 opposite the site of modification  |
| 124. | gDNA_16_9_C  | GGTTAGAC <b>C</b> TTAAGTC | 16 nt DNA guide with C in position 9 opposite the site of modification  |
| 125. | gDNA_16_10_C | AGGTTAGAC <b>C</b> TTAAGT | 16 nt DNA guide with C in position 10 opposite the site of modification |
| 126. | gDNA_16_11_C | TAGGTTAGAC <b>C</b> TTAAG | 16 nt DNA guide with C in position 11 opposite the site of modification |

|      |              |                  |                                                                         |
|------|--------------|------------------|-------------------------------------------------------------------------|
| 127. | gDNA_16_13_C | TATAGGTTAGACCTTA | 16 nt DNA guide with C in position 13 opposite the site of modification |
| 128. | gDNA_16_15_C | CCTATAGGTTAGACCT | 16 nt DNA guide with C in position 15 opposite the site of modification |

**Supplementary Table 2. Data collection and refinement statistics of PliAgo structures.**

| <b>Complex</b>           | <b>PliAgo (Native)</b> | <b>PliAgo-OH-gDNA complex</b> | <b>PliAgo-P-gDNA complex</b> | <b>PliAgo-P-gDNA-Mg<sup>2+</sup> complex</b> | <b>PliAgo (SeMet)</b> |
|--------------------------|------------------------|-------------------------------|------------------------------|----------------------------------------------|-----------------------|
| <b>PDB code</b>          | 7R8F                   | 7R8G                          | 7R8H                         | 7R8J                                         | 7R8K                  |
| <b>Data collection</b>   |                        |                               |                              |                                              |                       |
| Space group              | I23                    | I23                           | I23                          | I23                                          | I23                   |
| Cell dimensions          |                        |                               |                              |                                              |                       |
| <i>a</i> (Å)             | 197.94                 | 200.60                        | 199.82                       | 199.19                                       | 199.81                |
| <i>b</i> (Å)             | 197.94                 | 200.60                        | 199.82                       | 199.19                                       | 199.81                |
| <i>c</i> (Å)             | 197.94                 | 200.60                        | 199.82                       | 199.19                                       | 199.81                |
| $\beta$ (°)              | 90.00                  | 90.00                         | 90.00                        | 90.00                                        | 90,00                 |
| Resolution (Å)           | 50–3.10(3.21–3.10)*    | 50–2.50(2.54–2.50)*           | 50–2.54(2.59–2.54)*          | 50–2.70(2.75–2.70)*                          | 50–3.28(3.25–3.28)*   |
| Total reflections        | 425,622                | 469,596                       | 868,403                      | 697,735                                      | 342,776               |
| Unique reflections       | 23,413(2,310)*         | 46,475(2,292)*                | 43,544(2,179)*               | 36,116(1,764)*                               | 17,168(1,032)*        |
| Redundancy               | 18.2(15.7)*            | 10.1(10.3)*                   | 19.9(20.8)*                  | 19.3(19.2)*                                  | 20.0(19.7)*           |
| Completeness (%)         | 100(100)*              | 100(100)*                     | 100(100)*                    | 100(100)*                                    | 100(100)*             |
| <i>I</i> / $\sigma$      | 24(1.17)*              | 27.3(1)*                      | 28(1)*                       | 25.6(1.12)*                                  | 23.7(2.17)*           |
| CC <sup>1/2</sup>        | (0.331)*               | (0.344)*                      | (0.320)*                     | (0.371)*                                     | (0.699)*              |
| <b>Refinement</b>        |                        |                               |                              |                                              |                       |
| Resolution (Å)           | 49–3.16(3.23–3.16)     | 45–2.50(2.56–2.50)            | 45–2.54(2.61–2.54)           | 45–2.70(2.77–2.70)                           | 47–3.28(3.36–3.28)    |
| <i>R</i> <sub>work</sub> | 0.214(0.349)*          | 0.211(0.330)*                 | 0.200(0.395)*                | 0.206(0.349)*                                | 0.220(0.373)*         |
| <i>R</i> <sub>free</sub> | 0.258(0.426)*          | 0.254(0.384)*                 | 0.239(0.464)*                | 0.244(0.385)*                                | 0.265(0.388)*         |



|                          |       |       |       |       |       |
|--------------------------|-------|-------|-------|-------|-------|
| No. of atoms             | 6,019 | 6,336 | 6,408 | 6,264 | 6,029 |
| No. of waters            | 0     | 35    | 0     | 0     | 0     |
| R.m.s deviations         |       |       |       |       |       |
| Bond length (Å)          | 0.012 | 0.009 | 0.009 | 0.009 | 0.013 |
| Bond angles (°)          | 1.694 | 1.094 | 1.102 | 1.153 | 1.702 |
| Clashscore               | 12.44 | 8.73  | 7.73  | 11.6  | 17.69 |
| Ramachandran favored, %  | 93.32 | 90.48 | 93.87 | 93.18 | 84.07 |
| Ramachandran outliers, % | 1.31  | 2.22  | 0.39  | 0.26  | 1.17  |

Data sets were collected at MacCHESS ID7B2 line, Ithaca, NY

\*Highest resolution shells are shown in parentheses
