# Supplementary material for: Programmable RNA targeting by bacterial Argonaute nucleases with unconventional guide binding and cleavage specificity
Source: PubMed Central journal article supplement (PMC9360449; doi:10.1038/s41467-022-32079-5), 2022-08-08
Supplement: 41467_2022_32079_MOESM2_ESM.pdf [file 41467_2022_32079_MOESM2_ESM.pdf]

Editorial Note: This manuscript has been previously reviewed at another journal that is not operating a transparent peer review scheme. The manuscript was considered suitable for publication without further review at Nature Communications.
